# Supplementary material
Source: HighWire-hosted journal article supplement (http://molpharm.aspetjournals.org/highwire/filestream/77005/field_highwire_adjunct_files/0/supplemental_figure1.pdf)
Supplement: supplemental_figure1.pdf [file supplemental_figure1.pdf]

MOL #75630

Supporting information

for

**MOLECULAR PHARMACOLOGY**

Protein kinase C regulation of 12-lipoxygenase-mediated human platelet activation.

Jennifer Yeung, Patrick L. Apopa, Joanne Vesci, Victor Kenyon, Ganesha Rai, Ajit Jadhav, Anton Simeonov, Theodore R. Holman, David J. Maloney, Olivier Boutaud and Michael Holinstat

Departments of Medicine, Cardeza Foundation for Hematologic Research, Thomas Jefferson University, Philadelphia, PA (J.Y., P.L.A., J.V., M.H.), Chemistry and Biochemistry, University of California Santa Cruz, Santa Cruz, CA (V.K., T.R.H.), and NIH Chemical Genomics center, National Human Genome Research Institute, NIH, Bethesda, MD (G.R., A.J., A.S., D.J.M.), Pharmacology, Vanderbilt University Medical Center, Nashville, TN (O.B.).

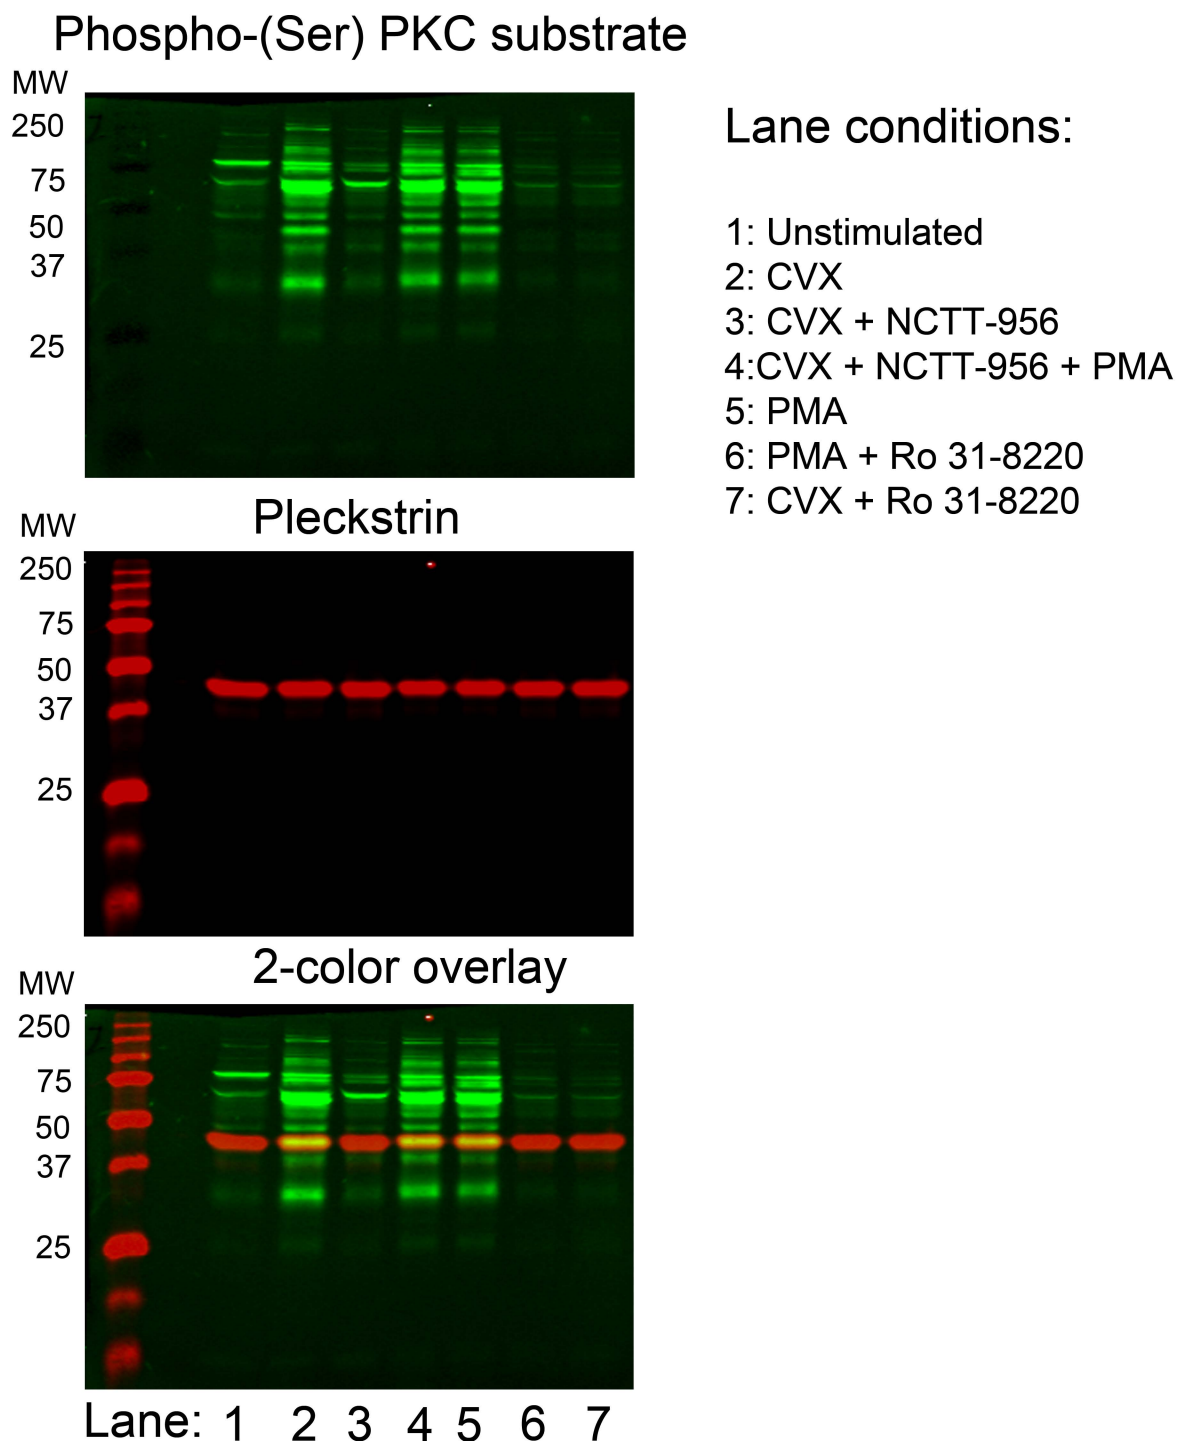

**Supplemental Figure 1: Pleckstrin is a 47 kDa protein corresponding to one of the phospho-(Ser)-PKC substrate bands.** To identify which of the phospho-(Ser) PKC substrate bands is pleckstrin, platelet samples were treated as indicated in the lane conditions on the right. Green represents phospho-(Ser) PKC substrate antibody staining, red represents pleckstrin antibody staining and the bottom panel is an overlay of the two analyzed with the 2-laser Licor imaging system. Pleckstrin staining correlates to a 47 kDa protein band in the phospho-(Ser) PKC substrate. Staining of This band in the phospho-(Ser) PKC substrate staining is significantly diminished in the presence of NCTT-956 or Ro 31-8220, but it rescued in the presence of NCTT-956 + PMA.
